# Supplementary material
Source: Research Square preprint supplement (doi:10.21203/rs.3.rs-8901759/v1)
Supplement: Supplementary file 1 [file 584acd262b5f67dc359255d3.docx]

**Supplemental Table S1. Variables and Item IDs Used for Organ System Scoring**

| **Organ System** | **Data Source** | **Key Variables and Item IDs** |
| --- | --- | --- |
| Respiratory | mimiciv_derived.respiration; mimiciv_derived.ventilation | PaO2/FiO2 ratio, mechanical ventilation status, inspired O2 fraction (ItemID 223835), PaO2 (ItemID 224684) |
| Cardiovascular | mimiciv_derived.vasoactive_agent; mimiciv_derived.bg | Vasopressor use (norepinephrine equivalents), mean arterial pressure |
| Central Nervous System | mimiciv_derived.gcs | Glasgow Coma Scale (eye, verbal, motor components) |
| Renal | mimiciv_hosp.labevents; mimiciv_derived.rrt | Serum creatinine (ItemID 50912), urine output, renal replacement therapy status |
| Liver | mimiciv_hosp.labevents | Bilirubin total (ItemID 50885) |
| Coagulation | mimiciv_hosp.labevents | Platelet count (ItemID 51265), INR (ItemID 51237) |
| Other/Baseline SOFA | mimiciv_derived.sofa | Composite SOFA score and individual component scores within first 24 hours |

| **Organ System** | **Data Source** | **Key Variables and Item IDs** |
| --- | --- | --- |
| Respiratory | mimiciv_derived.respiration; mimiciv_derived.ventilation | PaO2/FiO2 ratio, mechanical ventilation status, inspired O2 fraction (ItemID 223835), PaO2 (ItemID 224684), FiO2 set (ItemID 220339), O2 delivery device (ItemID 223830) |
| Cardiovascular | mimiciv_derived.vasoactive_agent; mimiciv_derived.bg | Vasopressor use (norepinephrine ItemID 221906, epinephrine ItemID 221289, dopamine ItemID 221662, dobutamine ItemID 221653, vasopressin ItemID 222315), mean arterial pressure (ItemID 220052 arterial, ItemID 220181 non-invasive) |
| Central Nervous System | mimiciv_derived.gcs | Glasgow Coma Scale eye (ItemID 220739), verbal (ItemID 223900), motor (ItemID 223901) |
| Renal | mimiciv_hosp.labevents; mimiciv_derived.rrt; mimiciv_derived.urine_output | Serum creatinine (ItemID 50912), urine output (from outputevents), renal replacement therapy status |
| Liver | mimiciv_hosp.labevents | Bilirubin total (ItemID 50885), bilirubin direct (ItemID 50883) |
| Coagulation | mimiciv_hosp.labevents | Platelet count (ItemID 51265), INR (ItemID 51237), PT (ItemID 51274), PTT (ItemID 51275) |
| Other/Baseline SOFA | mimiciv_derived.sofa | Composite SOFA score and individual component scores within first 24 hours (derived from above variables) |

**Supplemental Table S2. Detailed Item IDs and Variables Used for Hourly Organ System Aggregation**

**Supplemental Table S3.Sensitivity Analyses of Clustering Robustness Across Different Time Windows and Data Processing Strategies**

| **Analysis** | **Number of stays** | **Number of clusters** | **Silhouette score** | **Log-rank p-value** |
| --- | --- | --- | --- | --- |
| Primary analysis (72-hour window) | 30950 | 3 | 0.456 | <0.001 |
| Sensitivity 1: 48-hour time window | 30950 | 3 | 0.440 | <0.001 |
| Sensitivity 2: Exclude stays with >20% missing values per organ system | 30950 | 3 | 0.456 (same as primary) | <0.001 |
| Sensitivity 3: 96-hour time window | 30950 | 3 | 0.470 | <0.001 |
| Sensitivity 4: Exclude extreme outliers (1st/99th percentile) | 30950 | 3 | 0.436 | <0.001 |

Minor variations in cluster assignment were observed across runs due to numerical precision, but the overall mortality gradient and trajectory patterns remained consistent.
